# Supplementary material
Source: publisher figshare collection journal article supplement (https://gsapubs.figshare.com/articles/dataset/_/12542705)
Supplement: Supplementary file 1 [file 1]

Lawton, T.F., Amato, J.M., Machin, S.E.K., Gilbert, J.C., and Lucas, S.G., 2020, Transition from Late Jurassic rifting to middle Cretaceous dynamic foreland, southwestern U.S. and northwestern Mexico: GSA Bulletin, <https://doi.org/10.1130/B35433.1>.

## Data Repository

**Table DR1.** U-Pb geochronologic analyses of Upper Bisbee Group, Mancos, and Dakota sandstones, New Mexico and Arizona.

**Table DR2.** U-Pb geochronologic analyses of Lower Bisbee Group sandstones, New Mexico and Arizona.

**Table DR3a.** U-Pb geochronologic analyses of detrital zircon ages.

**Table DR3b.** U-Pb geochronologic analyses of igneous zircons.
